# Supplementary material
Source: publisher figshare collection journal article supplement (https://tandf.figshare.com/articles/dataset/_/5841207)
Supplement: Supplementary file 1 [file 1]

**Supplementary material:**

**Ratings for weighted kappa calculations for T-stage correlations:**

Ratings weighted by:

|      |      |      |
|------|------|------|
| 1.00 | 0.50 | 0.00 |
| 0.50 | 1.00 | 0.50 |
| 0.00 | 0.50 | 1.00 |

**Ratings for weighted kappa calculations for CRM correlations:**

Ratings weighted by:

|      |      |      |
|------|------|------|
| 1.00 | 0.75 | 0.50 |
| 0.75 | 1.00 | 0.75 |
| 0.50 | 0.75 | 1.00 |
