# Supplementary material
Source: publisher figshare collection journal article supplement (https://tandf.figshare.com/articles/dataset/_/5841207)
Supplement: Supplementary file 2 [file 1]

Archive with 4 entries (4 files):
- Supplementary_T-stage correlation in published literature.jpg
- Supplementary_Year 2009-2013.tif
- Supplementary_weighted kappa .pdf
- supplementary MRI protocol.xlsx
