# Supplementary material
Source: publisher figshare collection journal article supplement (https://tandf.figshare.com/articles/dataset/_/5841207)
Supplement: Supplementary file 2 [file 1 › supplementary MRI protocol.xlsx]

## Sheet: Ark1
	ID	Højde	Højde grp	Primær MR	Re-staging MR	OP-dato	ymrT	ypT	Supplerende		præop
010232-0921	1	6	midt	2008-12-22	2009-04-27	2009-05-05	T3	T3	ymrT3N1V1	ypT3N0V0	CRT
010354-1166	2	7	midt	2010-02-01	Ikke udført?	2010-05-20					CRT
010452-1622	3	4	lav	2009-06-18	2009-09-25	2009-10-05	T3	T2	ymrT3N2V1	ypT2N0V0	CRT
010554-1376	4	6	midt	2010-08-30	Ikke udført?	2010-12-08					CRT
020337-1292	5			2010-06-23	Ikke udført?	2010-10-12					CRT
020361-2109	6	3	lav	2009-06-02	2009-08-24	2009-09-15	T4	T2	ymrT4N1	ypT2N0V1	CRT
020442-1803	7	4	lav	2008-11-06	Ikke udført?	2009-03-06					CRT
020959-1855	8	8	midt	2011-06-08	Udført	ej op					CRT
030259-1253	9	10	midt	2009-06-22	Ikke udført?	2009-10-20					CRT
030260-1127	10	7	midt	2011-06-09	2011-09-20	2011-10-04	T3	T3	ymrT3N1V2 (dybde 10 mm, crm 0)	ypT3N0V0	CRT
030938-1270	11	9	midt	2008-12-22	2009-08-07	2009-09-17	T3	T3	ymrT3cN1	ypT3N0V0	CRT
030948-1941	12	5	lav	2011-02-21	2011-05-24	2011-05-30	T2	T2	ymrT2N2V0	ypT2N0V0	CRT
031038-1217	13	0	lav	2010-08-24	Århus	2011-01-31	Århus	Århus			CRT
031230-1253	14	0	lav	2009-09-08	2009-12-08	2009-12-18	T4	T3	ymrT4N0	ypT3N0V0	CRT
040133-1093	15	12	høj	2009-01-15	2009-04-23	2009-05-04	T3	T3	ymrT3N2V2	ypT3N0V0	CRT
040632-1541	16	2	lav	2010-04-15		ej op
050141-1205	17	0	lav	2009-03-19	2009-07-06	2009-07-13	T2	T2	ymrT2N1	ypT2N0V0	CRT
050142-1197	18	10	midt	ej mr		2011-10-06
050432-1126	19					ej op
050635-0824	20	0	lav	2009-10-12	Ikke udført?	2010-02-02
051135-0859	21	6	midt	2010-08-25	2010-12-21	2010-12-28	T3	T3	ymrT3N1 (dybde 19 CRM 0 )	ypT3N1	CRT
051250-1273	22	7	midt	2009-05-20	Ikke udført?	2009-08-20					CRT men får kun 7 fraktioner og udvikler ileus.
060342-1493	23	8	midt	2010-08-09	2010-11-22	2010-12-01	T3	T2	ymrT3N0V0	ypT2N0V0	CRT
070150-1519	24	3	lav	2009-11-24	2010-03-08	2010-04-26	T4	T4	ymrT4N2V2	ypT4N0V0	CRT
070234-0926	25	5	lav	2011-06-03	2011-09-28	2011-10-25	T4	T4	ymrT4N0	ypT4N0V0	CRT
070254-1409	26	3	lav	2009-04-16	2009-08-03	2009-08-13	T3	T3	ymrT3N1V2	ypT3N1V0	CRT
080540-1451	27	9	midt	2011-01-03	2011-04-12	2011-04-18	T3	T3	ymrT3N2V2	ypT3N0V0	CRT
080541-1430	28	11	høj	2009-10-09	2010-01-25	2010-02-08	T3	T1	ymrT3N2V4	ypT1N0V0	CRT
080649-1403	29	6	midt	2009-01-29	Ikke udført?	2009-05-19
080941-0323	30	7	midt	2010-02-22	2010-06-07	2010-07-01	T4	T3	ymrT4N2V4	ypT3N0V0	CRT
081029-1001	31	6	midt	2010-09-29	2011-01-17	2011-01-26	T3	T3	ymrT3N1V2	ypT3N0V0	CRT
081130-1493	32	3	lav	2010-03-16	2010-06-29		T4		ymrT3N0V0		CRT	Viborg patient, men restaget så kan findes i patoweb, hvis behov
090636-0896	33	7	midt	2009-02-24	2009-05-26	2009-09-01	T4		ymrT4N2		CRT	t-stadie tolket ud fra "involvering af mesorektale fascie og fortykkelse af peritoneum lokalt"									Opereret i århus, patoweb hvis behov
091228-0888	34	13	Høj	2010-04-26	2010-07-30	2010-08-11	T4	T3	ymrT4N1	ypT3N0V0	CRT
100446-1181	35	7	midt	2009-08-06	2009-11-13	2009-11-23	T3	T3	ymrT3N0V0	ypT3N0V0	CRT
100841-0948	36	8	midt	2011-08-22	2011-11-28	2011-12-29	T3	T0	ymrT3N0V2	ypT0N0V0	CRT
110437-0817	37	15	høj	2011-01-21		ej op						pt. Fravælger op.
110631-0935	38	10	midt	2009-02-09	2009-06-12	2009-07-30	T4	T4	ymrT4N2V4	ypT4N0V1	CRT
111137-0938	39	7	midt	2009-02-16	2009-05-22	2009-06-09		T0		ypT0N0V0	CRT	"kontakt til præsakrale fascie" Tolkning?
111263-1379	40	0	lav	2010-02-12	2011-08-23	2011-09-07	T3	T3	ymrT3	ypT3N0V0	WW2	T-stadie tolket ud fra "vokser netop gennem tarmvæggen"
120347-1773	41	4	lav	2009-11-18	2010-03-01	2010-03-10	T3	T3	ymrT3N1V0	ypT3N0V0	CRT
120347-3059	42	9	midt	2010-08-17	2010-12-07	2010-12-23	T3	T4	ymrT3N0	ypT4N0V1	CRT	op i århus
130752-1241	43	1.5	lav	2011-02-15	2011-05-23	2011-06-14	T2	T3	ymrT2N1V0	ypT3N1V1	CRT
130845-1433	44	3	lav	2011-01-10	2011-04-12	2011-04-19	T3	T0	ymrT3N1V0	ypT0N0V0	CRT
131060-0357	45	4	lav	2010-11-23	2011-03-29	2011-04-04	T4	T4	ymrT4N0V0	ypT4N2V0	CRT
131128-1271	46	10	midt	2008-09-09	2009-01-23	2009-02-03	T3	T3	ymrT3N2V3	ypT3N0V0	CRT
131139-0046	47	1	lav	2008-11-10	Ikke udført?	2009-03-03
140156-0900	48	3	lav	2009-09-28	Ikke udført?	2010-01-21
140248-1702	49	4	lav	2011-07-12	2011-10-17	2011-10-24	T3	T3	ymrT3N1V2	ypT3N1V0	CRT
140436-1429	50	5	lav	2011-02-01	2011-05-02	2011-05-18	T3	T3	ymrT3N2Vx	ypT3N1V0	5x5
150532-1177	51	7	midt	2009-10-12	2010-01-12	2010-01-19	T4	T3	ymrT4N1V3	ypT3N2V0	CRT
160740-1078	52			2011-02-24		ej op
160933-0933	53	3	lav	2011-07-18	2011-10-31	2011-11-08	T3	T2	ymrT3N1V2	ypT2N0V0	CRT
170455-1440	54	9	midt	2009-09-22	Ikke udført?	2010-01-04
170641-1425	55	10	midt	2009-12-13	Ikke udført?	2010-03-22
171147-1312	56	14	høj	2010-01-06	2010-05-17	2010-05-26	T4	T4	ymrT4N2V3	ypT4N2V0	CRT
180135-1235	57	3	lav	2011-08-05	2011-11-14	2011-11-22	T3	T3	ymrT3N1V2	ypT3N0V1	CRT
180146-1723	58	8	midt	2008-11-17	Ikke udført?	2009-03-02
180357-0783	59	4	lav	2009-09-07	2009-12-21	2010-02-17	T4	T3	ymrT4N1V3	ypT3N0V0	CRT
180364-1885	60	1	lav	2011-01-24	2011-04-26	2011-05-05	T3	T1	ymrT3N1V2	ypT1N0V0	CRT
181241-1183	61	4	lav	2010-02-25	2010-06-21	2010-06-29	T3	T2	ymrT3N0V2	ypT2N0V0	CRT
191042-1839	62	7	midt	2010-05-14	2010-08-24	2010-09-07	T2	T3	ymrT2N0V2	ypT3N0V0	CRT
200337-1215	63	4	lav	2010-10-29	Ikke udført?	2011-02-08
200548-0135	64	5	lav	2009-10-13	Ikke udført?	2010-01-26
200650-0903	65	4	lav	2011-09-01	2011-12-12	2011-12-20	T3	T0	ymrT3N0V2	ypT0N0V0	CRT
201239-1520	66	5	lav	2009-10-20	Ikke udført?	2010-02-03
210251-1835	67	8	midt	2010-04-08	2010-07-19	2010-07-28	T2	T1	ymrT2N0V0	ypT1N0V0	CRT
210346-2501	68	4	lav	2009-05-05	Ikke udført?	2009-08-25
210837-0990	69	8	midt	2010-08-24	2010-12-08	2011-01-12	T3		ymrT3N0V0			op i århus
221141-0879	70	3	lav	2011-02-10	2011-05-16	2011-05-23	T2	T0	ymrT2N0V0	ypT0N0V0	CRT
221242-1459	71	0	lav	2010-11-09	2011-02-07	2011-02-14	T3	T2	ymrT3N0V0	ypT2N0V0	CRT
230731-0859	72	10	midt	2009-09-24	2010-01-25	2010-02-01	T3	T2	ymrT3N2V3	ypT2N0V0	CRT
240427-1221	73	5	lav	2010-09-27	2011-01-10	2011-01-18	T3	T1	ymrT3N0V0	ypT1N0V0	CRT
240552-1523	74	4	lav	2010-09-17	Ikke udført?	2011-01-03
241248-2347	75	0	lav	2010-02-26	2010-06-04	2010-06-17	T3	T3	ymrT3N0V2	pT3N0V0	CRT
250368-2616	76	11	høj	2009-06-29	Ikke udført?	2009-10-13
250536-1159	77	3	lav	2011-01-11	2011-04-04	2011-04-20	T4	T3	ymrT4N0V0	pT3N0V0	CRT
250931-0907	78	8	midt	2008-10-15	Ikke udført?	2009-01-29
261042-1094	79	11	høj	2009-08-25	2009-12-07	2009-12-17	T3	T3	ymrT3N1	pT3N1V0	CRT
270152-0567	80	9	midt	2011-06-16	2011-09-19	2011-09-27	T3	T1	ymrT3N1V2	pT1N0V0	CRT
270440-0961	81	8	midt	2011-03-04	2011-06-14	2011-06-22	T3	T3	ymrT3N0V0	pT3N0V0	CRT
270732-1426	82	7	midt	2009-11-13	Ikke udført?	2010-02-23
270751-1101	83	8	midt	2009-07-03	Ikke udført?	2009-10-22
270929-1214	84	0	lav	2009-03-30	2009-07-10	2009-07-28	T4	T0	ymrT4N0V0	pT0N1V0	CRT
270937-0181	85	8	midt	2009-04-06	2009-07-08	2009-08-04	T4	T2	ymrT4N0V0	pT2N0V0	CRT
270941-1619	86	9	midt	2010-11-16	2011-02-22	2011-02-28	T3	T0	ymrT3N1V2	pT0N0V0	CRT
271246-1503	87	6	midt	2011-02-24	2011-06-06	2011-06-15	T3	T3	ymrT3N2V2	pT3N0V0	CRT
280757-1187	88	5	lav	2008-08-29	2008-12-22	2009-01-06	T3	T3	ymrT3N1V+	pT3N0V0	CRT
280834-1371	89	0	lav	2010-04-24	2010-08-23	2010-09-01	T4	T2	ymrT4N0	pT2N0V0	CRT
290334-1206	90	8	midt	2009-10-01	Ikke udført?	2010-01-18
290629-1099	91	8	midt	2009-04-21	2009-07-28	2009-08-10	T3	T3	ymrT3N2V4	pT3N2V0	CRT
300126-1389	92	2	lav	2009-06-05	2009-09-09	2009-10-07	T4	T3	ymrT4N2	pT3N1V0	CRT
300134-0645	93	4	lav	2009-12-05	Ikke udført?	2010-04-15
300333-0930	94	5	lav	2009-06-16	Ikke udført?	2009-10-09
300357-1008	95	6	midt	2011-01-12	2011-04-26	2011-05-02	T3	T2	ymrT3N0V2	ypT2N0V0	CRT
300439-1232	96	8	midt	2010-12-16	2011-03-28	2011-04-28	T3	T3	ymrT3N1V3	ypT3N0V0	CRT
300560-1516	97	4	lav	2010-01-08	2010-05-03	2010-05-26	T4	T4	ymrT4N1V0	ypT4N0V0	CRT	århus
300747-2209	98	4	lav	2009-08-07	2009-11-16		T3		ymrT3N2V4			århus
300960-1413	99	0	lav	2008-10-30	2008-10-29	2008-10-24	T3	T2	ymrT3N1	ypT2N1V1	CRT
310337-1340	100	8	midt	2009-03-23	2008-12-19		T3		ymrT3cN2			århus
311253-1695	101	3	lav	2011-04-27	2011-04-18	2011-04-27	T2	T2	ymrT2N0V0	ypT2N0V0	CRT
020656-1033	102					ej op
110439-1393	103					ej op
240656-1103	104					ej op
280274-2781	105	0	lav	2010-06-28	WW			T3				vejle
280540-1381	106	10	midt	2010-09-20	2011-01-17	2011-01-24	T3	T3	ymrT3N1	ypT3N0V0	CRT
2012	107
010548-1497	108	1	lav	2012-09-14	2012-12-27	2013-01-21	T4	T4	ymrT4N1V0	ypT4N0V1	CRT	århus
020345-2012	109	8	midt	2011-09-08	2012-01-09	2012-01-17	T3	T0	ymrT3N0V2	ypT0N0V0	CRT
030938-1378	110	6	midt	2012-03-21	2012-07-16	2012-07-25	T4	T3	ymrT4N0V3	ypT3N0V0	CRT
031046-1377	111	4	lav	2012-07-17	2012-10-29	2012-11-06	T3	T2	ymrT3N2V2	ypT2N1V0	CRT
040846-1979	112	0	lav	2012-10-19	2013-01-28	2013-02-05	T4	T0	ymrT4N1	ypT0N0V0	CRT
050252-1586	113	12	høj	2012-11-22	2013-03-01	2013-03-19	T3	T3	ymrT3N1V0	ypT4N1V0	CRT
050637-1031	114	3	lav	2012-04-12	mors
060137-0239	115	4	lav	2012-07-11	2012-10-22	2012-10-30	T3	T2	ymrT3N0V2	ypT2N0V0	CRT
060451-1461	116	9	midt	2012-08-30	2012-12-17	2013-01-02	T3	T3	ymrT3N0V3	ypT3N0V0	CRT
080253-1338	117	7	midt	2011-11-10	2012-02-13	2012-02-17	T3	T3	ymrT3N0V0	ypT3N0V0	CRT
090247-1758	118	0	lav	2012-04-26	2012-08-06	2012-08-20	T4	T3	ymrT4N0V1	ypT3N0V0	CRT
100636-1087	119	10	midt	2012-02-03	2012-06-18	ej op	T3		ymrT3N2V4
110147-2279	120	3	lav	2012-05-16		ej op
110943-1598	121	4	lav	2012-03-30	århus	århus
140851-1166	122	5	lav	2012-09-27	2013-01-07	2013-01-15	T3	T2	ymrT3N0V0	ypT2N0V0	CRT
141156-1875	123	5	lav	2012-05-22	århus	århus
151135-1312	124	7	midt	2012-08-21	2012-11-26	2012-12-04	T2	T2	ymrT2N1V0	ypT2N1V0	CRT
161046-1618	125	6	midt	2012-12-13	2013-03-27	2013-04-11	T3	T3	ymrT3N0V1	ypT3N0V1	CRT
180952-1687	126	7	midt	2012-03-22	2012-07-10	2012-07-13	T3	T3	ymrT3N0V4	ypT3N1V0	CRT
181040-0931	127	3	lav	2012-05-09	2012-09-11	2012-09-19	T2	T2	ymrT2N0V0	ypT2N0V0	CRT
191145-1588	128	9	midt	2012-10-01	2013-01-08	2013-01-16	T3	T3	ymrT3N0V0	ypT3N0V0	CRT
200555-0583	129	3	lav	2012-11-08	2013-02-11	2013-02-18	T3	T3	ymrT3N0V0	ypT3N1V0	CRT
210249-1567	130	6	midt	2012-02-02	2012-05-11	2012-05-22	T3	T0	ymrT3N0V0	ypT0N0V0	CRT
240845-1941	131	12	høj	2012-06-29	2012-10-15	ej op	T3		ymrT3N2V4
241143-1439	132	7	midt	2012-01-03	2012-05-08	2012-05-15	T3	T3	ymrT3N0V0	ypT3N1V0	CRT
250235-1225	133	9	midt	2012-04-20	2012-08-20	2012-09-04	T3	T3	ymrT3N1V2	ypT3N1V2	CRT	århus
250835-0409	134	8	midt	2012-07-02	2012-11-13	2012-11-27	T3	T3	ymrT3N2V4	ypT3N1V0	CRT
260145-1746	135	1	lav	2012-05-02	2012-09-10	2012-09-18	T3	T3	ymrT3N0V2	ypT3N0V1	CRT
260640-1097	136	8	midt	2012-08-24	2012-12-04	århus	T4		ymrT4N2V4
261257-0941	137	4	lav	2012-04-24	2012-08-07	2012-08-13	T3	T1	ymrT3N1V0	ypT1N0V0	CRT
280347-1889	138	3	lav	2012-09-28	2012-01-07	2013-01-17	T3	T0	ymrT3N0V0	ypT0N0V0	CRT
290952-1346	139	3	lav	2012-07-31	2012-11-19	2012-11-26	T3	T2	ymrT3N1V2	ypT2N0V1	CRT
2013	140
010961-1417	141	4	lav	2013-01-09	2013-04-22	2013-05-02	T3	T0	ymrT3N1V3	ypT0N0V0	CRT
020830-1438	142	8	lmidt	2013-05-06	2013-07-15	2013-07-26	T4	T4	ymrT4N0	ypT4N0V0	CRT
020840-1041	143	6	midt	2013-02-28	WW	ej op
030752-1482	144	3	lav	2013-02-19	2013-05-27	2013-06-13	T4	T2	ymrT4N1V2	ypT2N0V0	CRT
040846-1979	145	1	lav	2012-10-19	2013-01-28	2013-02-05	T4	T0	ymrT4N1	ypT0N0V0	CRT
050252-1586	146	12	høj	2012-11-22	2013-03-01	2013-03-19	T3	T3	ymrT3N1V1	ypT3N1V0	CRT
050455-1164	147	1	lav	2013-02-08	2013-05-30	2013-06-11	T4	T2	ymrT4N0V0	ypT2N0V0	CRT
051139-0982	148	4	lav	2013-01-31	2013-05-08	2013-05-22	T3	T2	ymrT3N0V2	ypT2N0V0	CRT
060451-1461	149	9	midt	2012-08-30	2012-12-17	2013-01-02	T3	T3	ymrT3N0V3	ypT3N0V0	CRT
060765-1515	150	3	lav	2013-01-30	2013-05-21	2013-05-28	T3	T2	ymrT3N0V2	ypT2N0V0	CRT
071246-1616	151	8	midt	2013-03-08	2013-07-02	2013-07-02	T4	T4	ymrT4N0V0	ypT4N0V0	CRT
080836-1205	152	6	midt	2013-07-01	2013-10-01	2013-10-15	T3	T3	ymrT3N1V0	ypT3N1V0	CRT
100440-1383	153	7	midt	2013-03-18	2013-07-01	2013-07-10	T3	T3	ymrT3N0	ypT3N0V1	CRT
120441-1685	154	8	midt	2013-03-26	2013-07-23	ej op
120450-2567	155	11	høj	2013-02-11	2013-05-23	2013-06-04	T3	T3	ymrT3N0V0	ypT3N0V0	CRT
120641-1453	156	7	midt	2013-03-11	2013-06-17	2013-07-19	T3	T0	ymrT3N0V1	ypT0N0V0	CRT
120759-1145	157	7	midt	2013-04-25	2013-08-06	2013-08-14	T3	T3	ymrT3N0V0	ypT3N0V0	CRT
130550-1871	158	9	midt	2013-05-06	2013-08-13	2013-08-20	T2	T0	ymrT2N1	ypT0N0V0	CRT
140591-1252	159	6	midt	2013-07-15	2013-10-28	2013-11-07	T3	T3	ymrT3N2V0	ypT3N0V0	CRT
140851-1166	160	5	lav	2012-09-27	2013-01-07	2013-01-15	T3	T2	ymrT3N0V0	ypT2N0V0	CRT
161046-1618	161	6	midt	2012-12-19	2013-03-27	2013-04-11	T3	T3	ymrT3N0V1	ypT3N0V1	CRT
161241-1103	162	5	lav	2013-02-19	2013-06-03	2013-06-10	T3	T3	ymrT3N0V3	ypT3N1V0	CRT
170348-2186	163	8	midt	2013-02-01	2013-05-13	2013-05-21	T3	T3	ymrT3N1V1	ypT3N0V1	CRT
180442-1447	164	9	midt	2013-02-06	2013-05-02	2013-05-30	T3	T3	ymrT3N0V4	ypT3N0V1	CRT
191145-1588	165	9	midt	2012-10-01	2013-01-08	2013-01-16	T3	T3	ymrT3N0V0	ypT3N0V0	CRT
200546-1742	166	3	lav	2013-08-05	2013-11-18	2013-12-02	T4	T2	ymrT4	ypT2N0V0	CRT
200555-0583	167	3	lav	2012-11-08	2013-02-11	2013-02-18	T3	T3	ymrT3N0V0	ypT3N1V0	CRT
230446-0760	168	3	lav	2013-04-08	2013-07-11	2013-07-23	T2	T2	ymrT2N0V0	ypT2N1V0	CRT
230446-2399	169	6	midt	2013-04-19	2013-08-02	2013-08-16	T3	T0	ymrT3N1V1	ypT0N0V0	CRT
251260-0754	170	4	lav	2012-12-06	2013-03-11	2013-03-25	T3	T1	ymrT3N0V0	ypT1N0V0	CRT
260243-1803	171	3	lav	2013-01-24	2013-05-14	2013-05-24	T4	T3	ymrT4N1V1	ypT3N0V0	CRT
261042-1078	172	4	lav	2013-02-28	2013-06-10	2013-06-20	T0	T0	ymrT0N0V0	ypT0N0V0	CRT	*kodet som ypT1, men i tekst ypT0
270540-1279	173	7	midt	2012-12-27	mors						5x5
280347-1889	174	3	lav	2012-09-28	2013-01-07	2013-01-17	T3	T0	ymrT3N0V0	ypT0N0V0	CRT
280534-1052	175	1	lav	2013-09-10	2013-11-18	mors	T4				5x5
280634-1498	176	1	lav	2013-02-22	århus	århus
280654-0687	177	6	midt	2013-07-29	2013-11-12	2013-11-19	T3	T3	ymrT3N0V0	ypT3N2V0	CRT
290651-1161	178	9	midt	2013-05-27	2013-09-06	2013-09-17	T3	T3	ymrT3N0V0	ypT3N1V0	CRT
300432-2036	179					ej op
310545-2011	180	6	midt	2013-06-17	2013-09-16	2013-10-02	T3	T3	ymrT3N1V3	ypT3N1V0	CRT
181135-0997	181	5	lav	Vejle	WW
010548-1497	182	3	lav	2012-09-14	2012-12-27	2013-01-21	T4	T4	ymrT4N1V0	ypT4N0V1	CRT
030236-1231	183	9	midt	2013-05-31	2013-09-05	pal	T3		ymrT3N0V0
060451-1461	184	9	midt	2012-08-30	2012-12-17	2013-01-02	T3	T3	ymrT3N0V3	ypT3N0V0	CRT
060920-0855	185			pal		ej op					5x5
120257-1189	186			Vejle	WW
190137-1705	187	9	midt	2013-08-14	2013-10-11	2013-10-25	T3	T3	ymrT3N1V1	ypT3N0V0	CRT
250940-1155	188			Vejle	WW
290162-1228	189	7	midt	2013-08-29	2013-12-03	2013-12-17	T3	T3	ymrT3N0V0	ypT3N0V0	CRT
210537-0779	190			Vejle	WW
2013-12-01	191
080762-1890	192	1	lav	ej mr	ej mr
200546-1742	193	dublet
290162-1228	194	dublet
030326-1478	195			ej op grundet alder og avanceret tumor. 5x5
160539-1725	196	5	lav	2013-12-12	2014-03-21	2014-04-02	T3	T3	ymrT3N0V0	ypT3N0V0	CRT

## Sheet: Height_grp
Høje tumorer n=8
		yMRT
													ej restaget	24
		0-1-2	3	4									ej op	22
ypT	0-1-2												ej mr	2
	3	1	5	0	6								ww	6
	4	0	1	1	2								dublet	1
	total	1	6	1	8								århus	4
														59
Midtrektale tumorer		n= 48												192
		yMRT												133
		0-1-2	3	4										høj	8
ypT	0-1-2	3	1	0	4				128					lav	63
	3	10	36	1	47									midt	62
	4	1	3	3	7
	total	11	39	4	58														192	preoperative chemoradiation
Lave tumorer		n = 48																		24	no restaging performed
																				22	no surgery performed
		yMRT																		2	no MRI perfromed
																				6	included in watchful waiting strategy
		0-1-2	3	4																1	double registration
ypT	0-1-2	7	1	0	8															4	Referred to advanced pelvic surgery
	3	21	13	0	34
	4	8	6	6	20															133
	total	29	19	6	62																8	high RC
																					62	mid RC
																					63	low RC

## Sheet: Ark2
	8 channel cardiac coil
	Sequence	Sagital	Coronal	Axial tumour	Coronal anal	Axial pelvis
	Field of view (cm2)	24	16	16	16	24
	Slice thickness (mm)	3	3	3	3	4
	Space (mm)	0	0	0	0	0.4
	TR (ms)	~5000	~3500	~4500	~4300	~10000
	TE (ms)	80	85	85	85	80
	Matrix	512*256	256*256	256*256	256*256	384*224
	NEX	4	4	5	4	4
	BW	42	21	21	21	31
	Phase dir.	S/I	L/R	L/R	L/R	L/R
