# Supplementary material
Source: publisher figshare collection journal article supplement (https://tandf.figshare.com/articles/dataset/_/5841207)

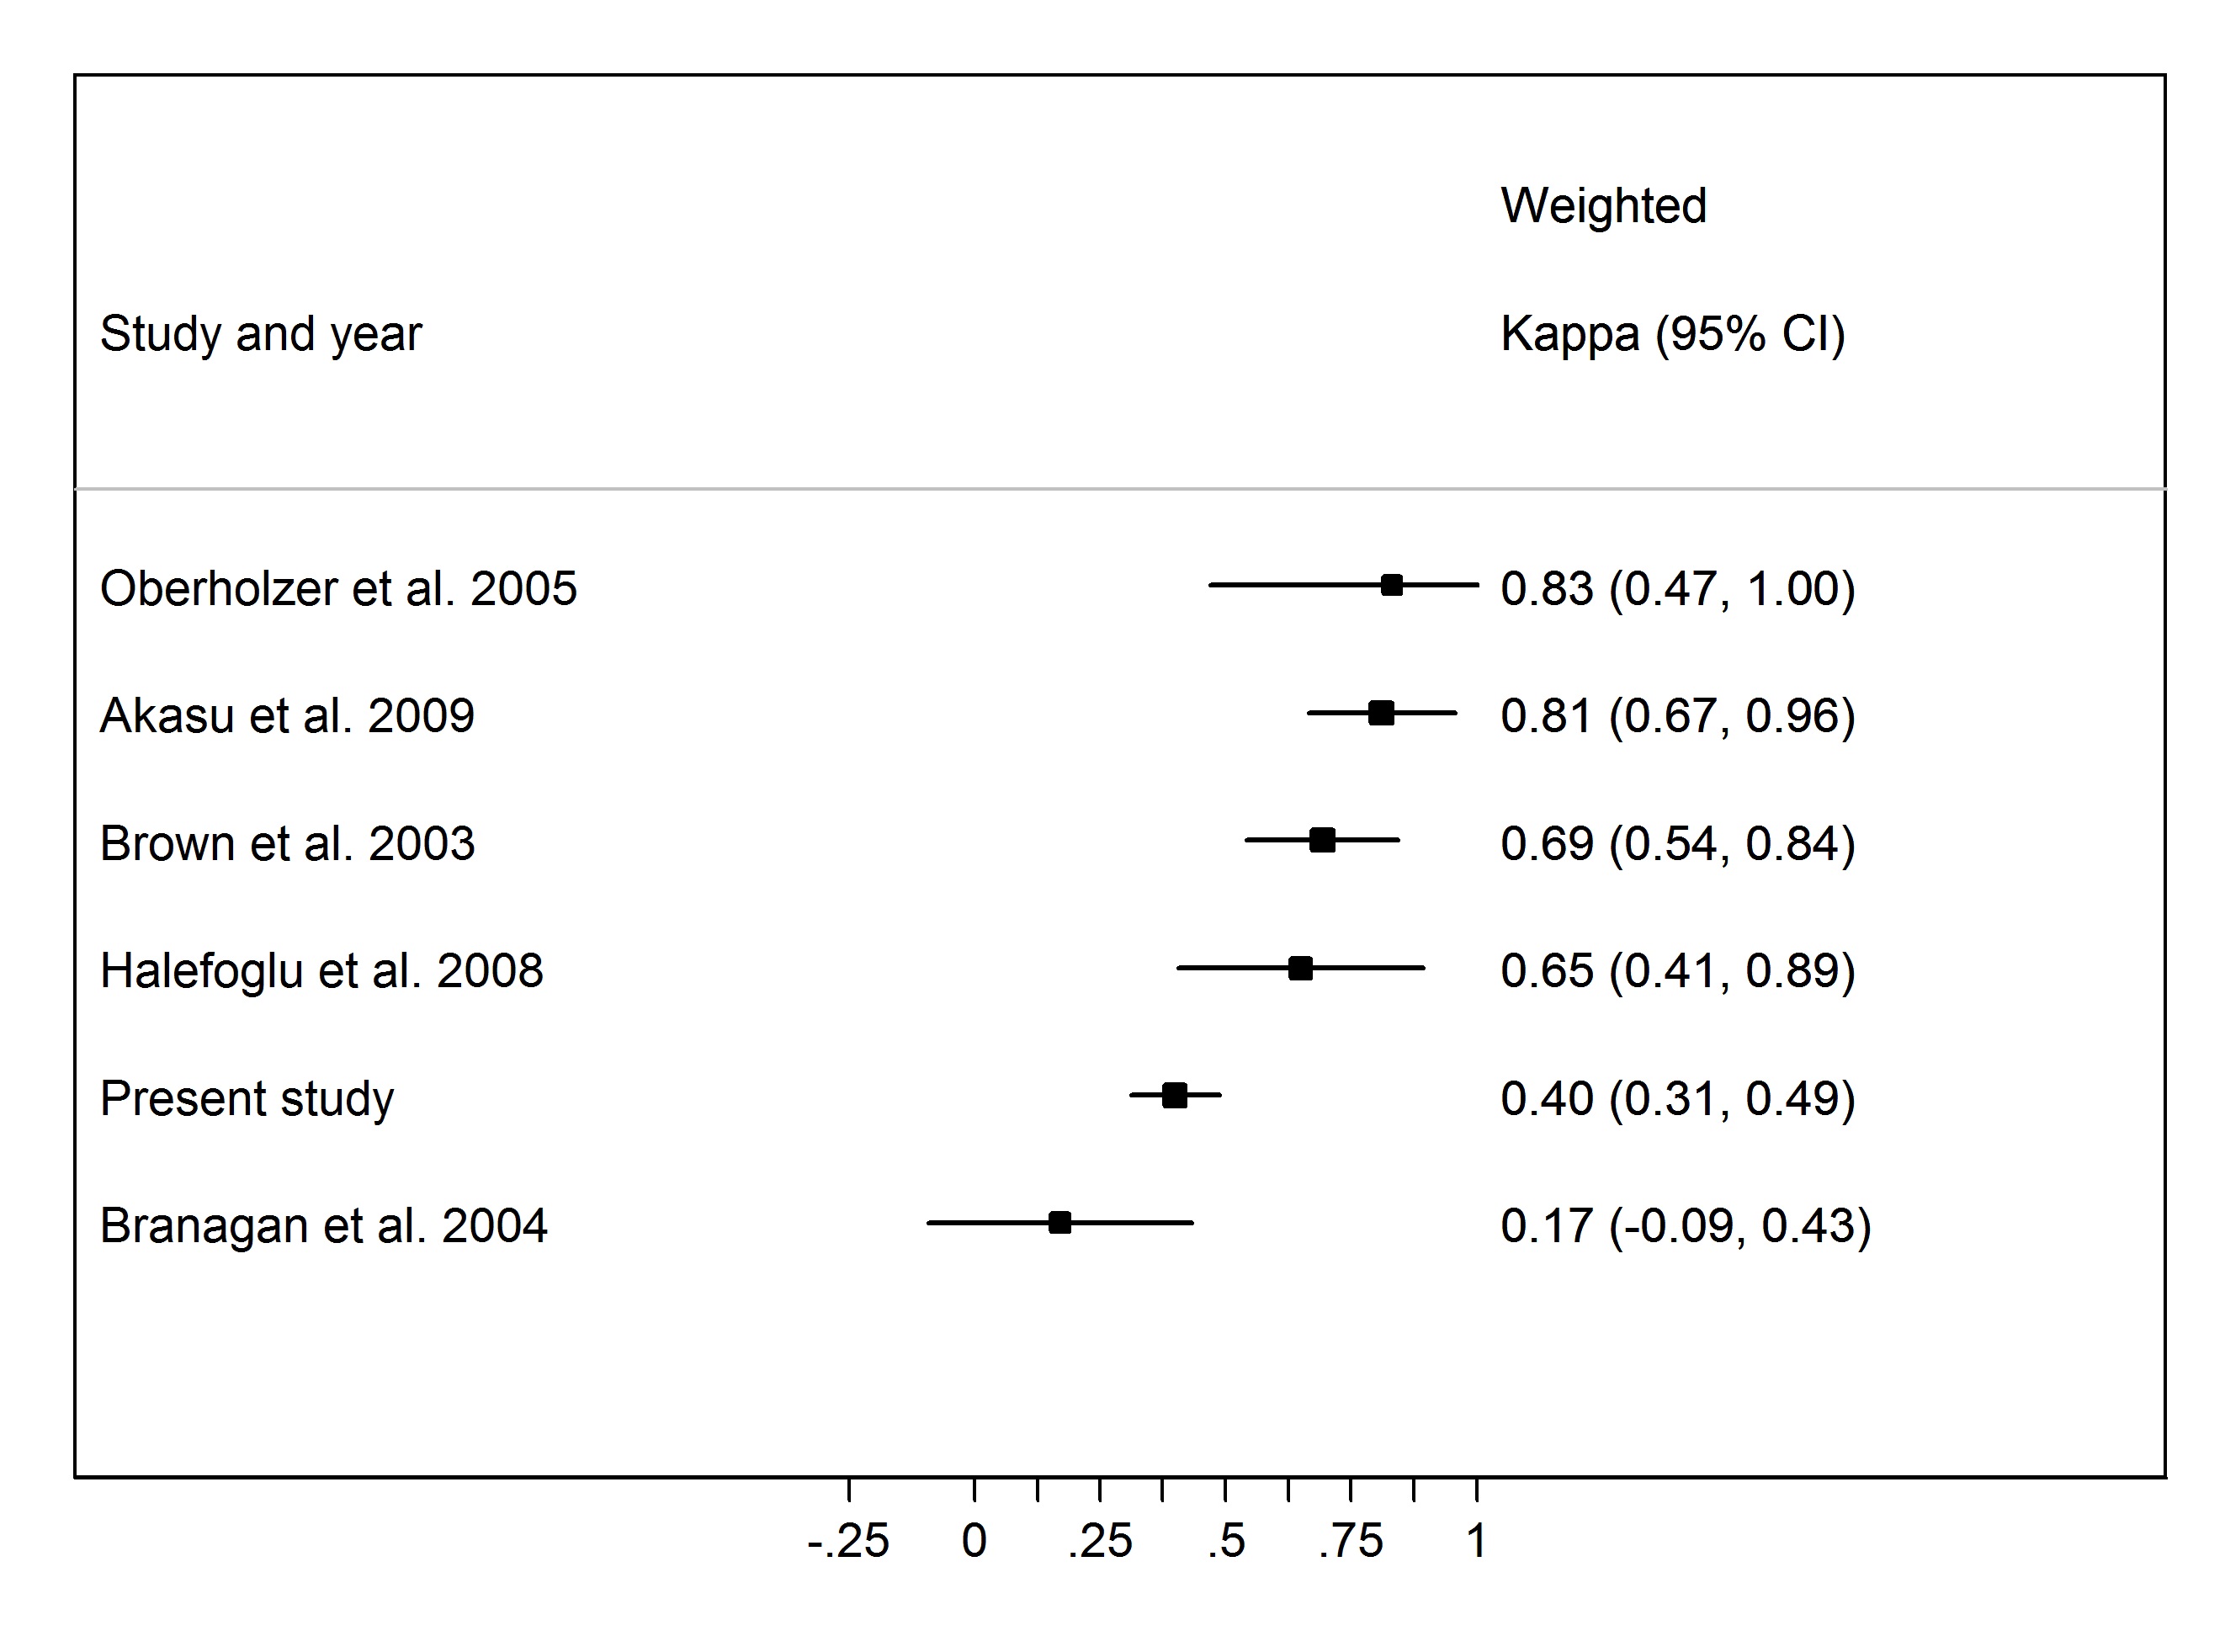

Supplement: Supplementary file 2 [file 1 › Supplementary_T-stage correlation in published literature.jpg]

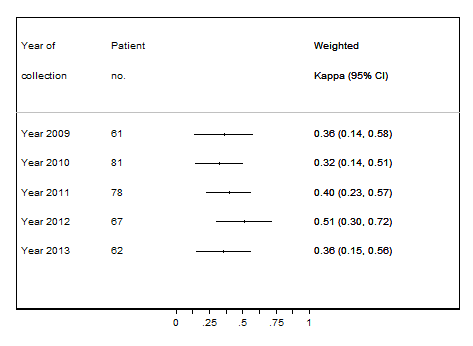

Supplement: Supplementary file 2 [file 1 › Supplementary_Year 2009-2013.tif]
